# Supplementary material for: EasyKASP: a simple and fast tool for KASP primer designing
Source: Research Square preprint supplement (doi:10.21203/rs.3.rs-7229783/v1), 2025-10-08
Supplement: Supplementary file 1 [file 8a7ddabc302f7e39accca5d8.xlsx]

## Sheet: Sheet2
	SNP_ID	allele_X	allele_Y	sequence	primer_X	primer_Y	primer_C
CsGy3G044470 (CsAPRR2)	CsAPRR2		C	AAATAACTACAGCGTATTTAATCAGGTTGTTTGGGACTAGACTCATTATATGATAGTGGACTCTAAGAACAGAAAACGTTA[/C]CCCCTGCGTAGGAATTCCAGGGCTGAATTCCAGGTTGTGGCCAATGGCGATAACCTAACGGACCCCAGACGTGGACATTA	GAAGGTGACCAAGTTCATGCTCTGGAATTCCTACGCAGGGGT	GAAGGTCGGAGTCAACGGATTTGGAATTCCTACGCAGGGGG	TATATGATAGTGGACTCTAAGAACAGAAAAC
CsGy5G026660 (CsMLO1)	CsMLO1	GAC		CAAAATTAAATCAAGAAGAATTTGCTCATGACTATGAATTT[GAC/]AACCTGGGAAGAACTAAAATTATTCACTCTT	GAAGGTGACCAAGTTCATGCTTGAATAATTTTAGTTCTTCCCAGGTTG	GAAGGTCGGAGTCAACGGATTGTGAATAATTTTAGTTCTTCCCAGGTTA	AAATTAAATCAAGAAGAATTTGCTCATGACTATG
CsGy2G018140(CsACS11)	CsACS11		CTAT	TTTTTTCATTAAAATATACCGGACGAGATCACTA[/CTAT]GTAGGGTGATCACTTGGAAAATAATATCCCTTGATGGTAAACAAGGGATACAAAGAAA	GAAGGTGACCAAGTTCATGCTTAAAATATACCGGACGAGATCACTAG	GAAGGTCGGAGTCAACGGATTTAAAATATACCGGACGAGATCACTAC	CCATCAAGGGATATTATTTTCCAAGTGATC
CsGy1G001790 (CsBADH)	CsBADH	GCACC		GAAAGGTGTGACCGTGTAGCCAAGGTGAGGATTGGAATTATCAA[GCACC/]TATATGGCATACGCAAACGAGAAACCTCTGAATTTCTGATCACTTCGTGTTTCC	GAAGGTGACCAAGTTCATGCTCAAGGTGAGGATTGGAATTATCAAG	GAAGGTCGGAGTCAACGGATTCCAAGGTGAGGATTGGAATTATCAAT	AAATTCAGAGGTTTCTCGTTTGCGTATG
Chr7-183336	InD_Cu38		CAATATTGTCAATTGCTTCAATCAAATTTAGAGC	TCTAGAGTGAATACTAATGAATTATTTATCAACGACTTAAACGAGAAGGTGATTCAATT[/CAATATTGTCAATTGCTTCAATCAAATTTAGAGC]CGAACAAATGGAATCTAGCTATCAAACTATTAGGGTTTGTAATTTTTG	GAAGGTGACCAAGTTCATGCTTTTGATAGCTAGATTCCATTTGTTCGA	GAAGGTCGGAGTCAACGGATTTTGATAGCTAGATTCCATTTGTTCGG	ATTATTTATCAACGACTTAAACGAGAAGGTG
Chr6-22841215	InD_Cu68	CACATTTCCTTGTTCAAATTAGGCTAGTTCGATTTCTAGGATGATTTAGT		CCAACCTAATATTCTCGGAATCTTAAATGCAATTAGATTGATTCAAAATGACA[CACATTTCCTTGTTCAAATTAGGCTAGTTCGATTTCTAGGATGATTTAGT/]TACCTTTTCTAATTAAATTGGTTAGGTATTATAAGCAATAAATCATTTAGTG	GAAGGTGACCAAGTTCATGCTCTAGCCTAATTTGAACAAGGAAATGTG	GAAGGTCGGAGTCAACGGATTTATAATACCTAACCAATTTAATTAGAAAAGGTAT	CTCGGAATCTTAAATGCAATTAGATTGATTC
