# Supplementary material for: EasyKASP: a simple and fast tool for KASP primer designing
Source: Research Square preprint supplement (doi:10.21203/rs.3.rs-7229783/v1), 2025-10-08
Supplement: Supplementary file 2 [file fbe543a758f462384f9619e5.xlsx]

## Sheet: 500 KASP primers
	Primer_FAM			Primer_HEX			Primer_COM
ID	Length	GC%	Tm value	Length	GC%	Tm value	Length	GC%	Tm value
snp01	26	38.4615	57.6538	27	37.037	58.1852	25	48	60.072
snp02	26	38.4615	57.6538	25	40	57.08	29	37.931	60.4276
snp03	26	38.4615	57.6538	25	44	58.576	31	32.2581	59.9677
snp04	23	47.8261	57.4087	25	40	57.08	25	48	60.072
snp05	27	37.037	58.1852	26	38.4615	57.6538	36	25	60.6
snp06	30	30	58.32	29	31.0345	57.8483	31	32.2581	59.9677
snp07	26	38.4615	57.6538	25	44	58.576	28	39.2857	60.0143
snp08	34	17.6471	56.6294	34	20.5882	57.7294	37	21.6216	59.8973
snp09	23	47.8261	57.4087	22	50	56.7455	27	44.4444	60.9556
snp10	26	38.4615	57.6538	26	38.4615	57.6538	29	37.931	60.4276
snp11	29	31.0345	57.8483	31	25.8065	57.5548	28	39.2857	60.0143
snp12	29	31.0345	57.8483	27	37.037	58.1852	31	32.2581	59.9677
snp13	36	16.6667	57.4833	36	16.6667	57.4833	29	37.931	60.4276
snp14	30	26.6667	57.0733	27	33.3333	56.8	31	32.2581	59.9677
snp15	29	31.0345	57.8483	26	38.4615	57.6538	32	31.25	60.3438
snp16	31	25.8065	57.5548	31	25.8065	57.5548	32	31.25	60.3438
snp17	32	21.875	56.8375	32	21.875	56.8375	31	32.2581	59.9677
snp18	25	44	58.576	24	45.8333	58.0167	33	30.303	60.697
snp19	29	31.0345	57.8483	30	26.6667	57.0733	30	36.6667	60.8133
snp20	25	44	58.576	24	45.8333	58.0167	30	36.6667	60.8133
snp21	23	47.8261	57.4087	21	57.1429	57.8	34	26.4706	59.9294
snp22	32	21.875	56.8375	32	21.875	56.8375	35	25.7143	60.2743
snp23	27	37.037	58.1852	28	32.1429	57.3429	34	26.4706	59.9294
snp24	27	33.3333	56.8	27	37.037	58.1852	31	32.2581	59.9677
snp25	23	47.8261	57.4087	23	47.8261	57.4087	23	56.5217	60.6609
snp26	36	16.6667	57.4833	36	16.6667	57.4833	33	30.303	60.697
snp27	30	30	58.32	29	31.0345	57.8483	34	26.4706	59.9294
snp28	31	25.8065	57.5548	29	31.0345	57.8483	37	21.6216	59.8973
snp29	26	38.4615	57.6538	26	38.4615	57.6538	31	32.2581	59.9677
snp30	27	33.3333	56.8	26	38.4615	57.6538	34	29.4118	61.0294
snp31	22	50	56.7455	22	54.5455	58.4455	25	48	60.072
snp32	36	16.6667	57.4833	36	16.6667	57.4833	25	48	60.072
snp33	25	44	58.576	25	40	57.08	30	36.6667	60.8133
snp34	25	40	57.08	23	47.8261	57.4087	34	26.4706	59.9294
snp35	30	26.6667	57.0733	30	26.6667	57.0733	32	31.25	60.3438
snp36	23	47.8261	57.4087	26	38.4615	57.6538	29	37.931	60.4276
snp37	36	16.6667	57.4833	35	17.1429	57.0686	31	32.2581	59.9677
snp38	26	38.4615	57.6538	25	40	57.08	33	30.303	60.697
snp39	31	25.8065	57.5548	30	30	58.32	26	46.1538	60.5308
snp40	23	47.8261	57.4087	24	45.8333	58.0167	31	32.2581	59.9677
snp41	23	47.8261	57.4087	22	50	56.7455	28	39.2857	60.0143
snp42	25	40	57.08	26	38.4615	57.6538	25	48	60.072
snp43	29	31.0345	57.8483	26	38.4615	57.6538	29	37.931	60.4276
snp44	35	17.1429	57.0686	34	20.5882	57.7294	31	32.2581	59.9677
snp45	26	38.4615	57.6538	29	31.0345	57.8483	28	39.2857	60.0143
snp46	29	31.0345	57.8483	26	38.4615	57.6538	37	24.3243	60.9081
snp47	32	25	58.0063	31	25.8065	57.5548	34	26.4706	59.9294
snp48	36	16.6667	57.4833	37	13.5135	56.8649	38	21.0526	60.2158
snp49	26	38.4615	57.6538	29	31.0345	57.8483	34	26.4706	59.9294
snp50	26	38.4615	57.6538	23	47.8261	57.4087	23	56.5217	60.6609
snp51	28	32.1429	57.3429	27	37.037	58.1852	38	21.0526	60.2158
snp52	24	45.8333	58.0167	23	47.8261	57.4087	34	26.4706	59.9294
snp53	33	21.2121	57.297	31	25.8065	57.5548	31	32.2581	59.9677
snp54	23	47.8261	57.4087	23	47.8261	57.4087	29	37.931	60.4276
snp55	29	31.0345	57.8483	29	31.0345	57.8483	30	36.6667	60.8133
snp56	37	10.8108	55.8541	37	13.5135	56.8649	28	39.2857	60.0143
snp57	23	47.8261	57.4087	25	44	58.576	25	48	60.072
snp58	25	44	58.576	24	45.8333	58.0167	32	31.25	60.3438
snp59	23	47.8261	57.4087	26	38.4615	57.6538	31	32.2581	59.9677
snp60	28	32.1429	57.3429	26	38.4615	57.6538	34	26.4706	59.9294
snp61	26	38.4615	57.6538	23	47.8261	57.4087	22	59.0909	60.1455
snp62	25	44	58.576	23	47.8261	57.4087	25	48	60.072
snp63	30	30	58.32	29	31.0345	57.8483	25	48	60.072
snp64	26	38.4615	57.6538	26	38.4615	57.6538	29	37.931	60.4276
snp65	25	40	57.08	26	38.4615	57.6538	26	46.1538	60.5308
snp66	22	50	56.7455	21	57.1429	57.8	28	39.2857	60.0143
snp67	29	31.0345	57.8483	26	38.4615	57.6538	29	37.931	60.4276
snp68	24	45.8333	58.0167	26	38.4615	57.6538	34	29.4118	61.0294
snp69	37	13.5135	56.8649	37	13.5135	56.8649	34	26.4706	59.9294
snp70	26	38.4615	57.6538	29	31.0345	57.8483	37	24.3243	60.9081
snp71	31	25.8065	57.5548	29	31.0345	57.8483	29	37.931	60.4276
snp72	23	47.8261	57.4087	26	38.4615	57.6538	31	32.2581	59.9677
snp73	25	44	58.576	25	40	57.08	25	48	60.072
snp74	21	57.1429	57.8	22	50	56.7455	28	39.2857	60.0143
snp75	23	47.8261	57.4087	23	47.8261	57.4087	27	44.4444	60.9556
snp76	31	25.8065	57.5548	34	20.5882	57.7294	37	21.6216	59.8973
snp77	26	38.4615	57.6538	26	38.4615	57.6538	31	32.2581	59.9677
snp78	23	47.8261	57.4087	21	57.1429	57.8	25	48	60.072
snp79	25	44	58.576	25	44	58.576	28	39.2857	60.0143
snp80	36	16.6667	57.4833	34	20.5882	57.7294	25	48	60.072
snp81	23	47.8261	57.4087	25	44	58.576	29	37.931	60.4276
snp82	27	33.3333	56.8	27	37.037	58.1852	34	26.4706	59.9294
snp83	27	33.3333	56.8	29	31.0345	57.8483	30	36.6667	60.8133
snp84	29	31.0345	57.8483	31	25.8065	57.5548	30	36.6667	60.8133
snp85	31	25.8065	57.5548	29	31.0345	57.8483	29	37.931	60.4276
snp86	29	31.0345	57.8483	26	38.4615	57.6538	32	31.25	60.3438
snp87	22	54.5455	58.4455	21	57.1429	57.8	26	46.1538	60.5308
snp88	29	31.0345	57.8483	28	32.1429	57.3429	31	32.2581	59.9677
snp89	26	38.4615	57.6538	25	44	58.576	34	26.4706	59.9294
snp90	31	25.8065	57.5548	30	30	58.32	25	48	60.072
snp91	26	38.4615	57.6538	29	31.0345	57.8483	28	39.2857	60.0143
snp92	22	54.5455	58.4455	22	54.5455	58.4455	26	46.1538	60.5308
snp93	26	38.4615	57.6538	23	47.8261	57.4087	37	21.6216	59.8973
snp94	29	31.0345	57.8483	31	25.8065	57.5548	31	32.2581	59.9677
snp95	22	50	56.7455	23	47.8261	57.4087	28	39.2857	60.0143
snp96	23	47.8261	57.4087	23	47.8261	57.4087	27	44.4444	60.9556
snp97	22	50	56.7455	23	47.8261	57.4087	22	59.0909	60.1455
snp98	26	38.4615	57.6538	27	33.3333	56.8	32	31.25	60.3438
snp99	22	50	56.7455	23	47.8261	57.4087	25	48	60.072
snp100	24	45.8333	58.0167	23	47.8261	57.4087	28	39.2857	60.0143
snp101	25	40	57.08	25	40	57.08	31	32.2581	59.9677
snp102	27	37.037	58.1852	27	37.037	58.1852	30	36.6667	60.8133
snp103	25	44	58.576	25	44	58.576	27	44.4444	60.9556
snp104	29	31.0345	57.8483	29	27.5862	56.5586	33	30.303	60.697
snp105	28	32.1429	57.3429	29	31.0345	57.8483	25	48	60.072
snp106	30	30	58.32	31	25.8065	57.5548	34	26.4706	59.9294
snp107	26	38.4615	57.6538	28	32.1429	57.3429	28	39.2857	60.0143
snp108	24	45.8333	58.0167	26	38.4615	57.6538	29	37.931	60.4276
snp109	23	47.8261	57.4087	23	47.8261	57.4087	29	37.931	60.4276
snp110	25	44	58.576	26	38.4615	57.6538	30	36.6667	60.8133
snp111	25	44	58.576	26	38.4615	57.6538	28	39.2857	60.0143
snp112	34	20.5882	57.7294	36	16.6667	57.4833	38	21.0526	60.2158
snp113	26	38.4615	57.6538	27	33.3333	56.8	31	32.2581	59.9677
snp114	23	47.8261	57.4087	24	45.8333	58.0167	25	48	60.072
snp115	36	16.6667	57.4833	36	16.6667	57.4833	30	36.6667	60.8133
snp116	26	38.4615	57.6538	27	37.037	58.1852	31	32.2581	59.9677
snp117	27	37.037	58.1852	27	37.037	58.1852	34	29.4118	61.0294
snp118	37	13.5135	56.8649	37	13.5135	56.8649	31	32.2581	59.9677
snp119	26	38.4615	57.6538	24	45.8333	58.0167	34	29.4118	61.0294
snp120	21	57.1429	57.8	20	65	58.96	29	37.931	60.4276
snp121	35	17.1429	57.0686	35	17.1429	57.0686	34	26.4706	59.9294
snp122	24	45.8333	58.0167	25	40	57.08	29	37.931	60.4276
snp123	20	60	57.09	21	57.1429	57.8	20	70	60.83
snp124	36	16.6667	57.4833	36	16.6667	57.4833	37	24.3243	60.9081
snp125	23	47.8261	57.4087	23	47.8261	57.4087	25	48	60.072
snp126	23	47.8261	57.4087	26	38.4615	57.6538	29	37.931	60.4276
snp127	24	45.8333	58.0167	25	40	57.08	29	37.931	60.4276
snp128	30	26.6667	57.0733	29	31.0345	57.8483	23	56.5217	60.6609
snp129	37	13.5135	56.8649	37	13.5135	56.8649	34	26.4706	59.9294
snp130	26	38.4615	57.6538	29	31.0345	57.8483	34	26.4706	59.9294
snp131	24	45.8333	58.0167	25	40	57.08	31	32.2581	59.9677
snp132	30	26.6667	57.0733	30	30	58.32	31	32.2581	59.9677
snp133	26	38.4615	57.6538	27	33.3333	56.8	35	25.7143	60.2743
snp134	31	25.8065	57.5548	31	25.8065	57.5548	34	26.4706	59.9294
snp135	29	31.0345	57.8483	27	33.3333	56.8	34	26.4706	59.9294
snp136	29	31.0345	57.8483	26	38.4615	57.6538	22	59.0909	60.1455
snp137	23	47.8261	57.4087	24	45.8333	58.0167	29	37.931	60.4276
snp138	23	47.8261	57.4087	26	38.4615	57.6538	29	37.931	60.4276
snp139	31	25.8065	57.5548	30	30	58.32	34	26.4706	59.9294
snp140	34	20.5882	57.7294	34	17.6471	56.6294	34	26.4706	59.9294
snp141	26	38.4615	57.6538	28	32.1429	57.3429	31	32.2581	59.9677
snp142	25	44	58.576	24	45.8333	58.0167	28	39.2857	60.0143
snp143	29	31.0345	57.8483	27	37.037	58.1852	31	32.2581	59.9677
snp144	27	37.037	58.1852	27	37.037	58.1852	31	32.2581	59.9677
snp145	23	47.8261	57.4087	22	50	56.7455	31	32.2581	59.9677
snp146	23	47.8261	57.4087	22	50	56.7455	31	32.2581	59.9677
snp147	25	44	58.576	26	38.4615	57.6538	26	46.1538	60.5308
snp148	25	44	58.576	26	38.4615	57.6538	25	48	60.072
snp149	32	25	58.0063	31	25.8065	57.5548	31	32.2581	59.9677
snp150	27	37.037	58.1852	26	38.4615	57.6538	28	39.2857	60.0143
snp151	29	31.0345	57.8483	31	25.8065	57.5548	29	37.931	60.4276
snp152	34	20.5882	57.7294	36	16.6667	57.4833	31	32.2581	59.9677
snp153	24	45.8333	58.0167	24	45.8333	58.0167	37	21.6216	59.8973
snp154	26	38.4615	57.6538	27	37.037	58.1852	30	36.6667	60.8133
snp155	25	44	58.576	23	47.8261	57.4087	37	21.6216	59.8973
snp156	27	37.037	58.1852	29	31.0345	57.8483	33	30.303	60.697
snp157	31	25.8065	57.5548	29	31.0345	57.8483	34	26.4706	59.9294
snp158	20	60	57.09	20	65	58.96	31	32.2581	59.9677
snp159	26	38.4615	57.6538	28	32.1429	57.3429	30	36.6667	60.8133
snp160	36	16.6667	57.4833	34	20.5882	57.7294	34	26.4706	59.9294
snp161	25	40	57.08	25	44	58.576	34	26.4706	59.9294
snp162	26	38.4615	57.6538	25	44	58.576	34	26.4706	59.9294
snp163	29	31.0345	57.8483	30	30	58.32	34	26.4706	59.9294
snp164	32	25	58.0063	34	20.5882	57.7294	31	32.2581	59.9677
snp165	29	31.0345	57.8483	29	31.0345	57.8483	26	46.1538	60.5308
snp166	36	16.6667	57.4833	34	20.5882	57.7294	34	26.4706	59.9294
snp167	29	31.0345	57.8483	31	25.8065	57.5548	34	26.4706	59.9294
snp168	30	26.6667	57.0733	30	26.6667	57.0733	37	24.3243	60.9081
snp169	25	44	58.576	23	47.8261	57.4087	27	44.4444	60.9556
snp170	27	37.037	58.1852	26	38.4615	57.6538	31	32.2581	59.9677
snp171	31	25.8065	57.5548	29	31.0345	57.8483	37	21.6216	59.8973
snp172	25	44	58.576	23	47.8261	57.4087	29	37.931	60.4276
snp173	27	37.037	58.1852	28	32.1429	57.3429	31	32.2581	59.9677
snp174	30	26.6667	57.0733	29	31.0345	57.8483	32	31.25	60.3438
snp175	34	20.5882	57.7294	31	25.8065	57.5548	35	25.7143	60.2743
snp176	31	25.8065	57.5548	32	25	58.0063	34	26.4706	59.9294
snp177	25	44	58.576	25	40	57.08	33	30.303	60.697
snp178	24	45.8333	58.0167	24	45.8333	58.0167	27	44.4444	60.9556
snp179	34	20.5882	57.7294	35	17.1429	57.0686	37	21.6216	59.8973
snp180	27	37.037	58.1852	26	38.4615	57.6538	34	26.4706	59.9294
snp181	24	45.8333	58.0167	26	38.4615	57.6538	38	21.0526	60.2158
snp182	23	47.8261	57.4087	21	57.1429	57.8	28	39.2857	60.0143
snp183	23	47.8261	57.4087	22	50	56.7455	31	32.2581	59.9677
snp184	23	47.8261	57.4087	26	38.4615	57.6538	28	39.2857	60.0143
snp185	29	31.0345	57.8483	26	38.4615	57.6538	34	26.4706	59.9294
snp186	23	47.8261	57.4087	22	50	56.7455	33	30.303	60.697
snp187	31	25.8065	57.5548	29	31.0345	57.8483	37	21.6216	59.8973
snp188	32	21.875	56.8375	31	25.8065	57.5548	34	26.4706	59.9294
snp189	37	13.5135	56.8649	37	16.2162	57.8757	34	29.4118	61.0294
snp190	28	32.1429	57.3429	29	31.0345	57.8483	30	36.6667	60.8133
snp191	21	57.1429	57.8	18	72.2222	57.5111	28	39.2857	60.0143
snp192	23	47.8261	57.4087	24	45.8333	58.0167	28	39.2857	60.0143
snp193	29	31.0345	57.8483	31	25.8065	57.5548	36	25	60.6
snp194	27	33.3333	56.8	27	33.3333	56.8	25	48	60.072
snp195	23	47.8261	57.4087	21	57.1429	57.8	29	37.931	60.4276
snp196	26	38.4615	57.6538	27	33.3333	56.8	33	30.303	60.697
snp197	23	47.8261	57.4087	22	54.5455	58.4455	30	36.6667	60.8133
snp198	25	40	57.08	25	40	57.08	34	26.4706	59.9294
snp199	28	32.1429	57.3429	27	37.037	58.1852	34	29.4118	61.0294
snp200	31	25.8065	57.5548	30	26.6667	57.0733	34	29.4118	61.0294
snp201	29	31.0345	57.8483	30	30	58.32	34	26.4706	59.9294
snp202	33	21.2121	57.297	33	21.2121	57.297	31	32.2581	59.9677
snp203	31	25.8065	57.5548	34	20.5882	57.7294	34	26.4706	59.9294
snp204	26	38.4615	57.6538	27	33.3333	56.8	20	70	60.83
snp205	29	31.0345	57.8483	27	37.037	58.1852	27	44.4444	60.9556
snp206	30	26.6667	57.0733	29	31.0345	57.8483	29	37.931	60.4276
snp207	33	21.2121	57.297	32	25	58.0063	23	56.5217	60.6609
snp208	26	38.4615	57.6538	23	47.8261	57.4087	28	39.2857	60.0143
snp209	29	31.0345	57.8483	31	25.8065	57.5548	32	31.25	60.3438
snp210	21	57.1429	57.8	23	47.8261	57.4087	31	32.2581	59.9677
snp211	29	31.0345	57.8483	30	26.6667	57.0733	25	48	60.072
snp212	21	57.1429	57.8	23	47.8261	57.4087	25	48	60.072
snp213	36	16.6667	57.4833	36	16.6667	57.4833	34	29.4118	61.0294
snp214	26	38.4615	57.6538	26	38.4615	57.6538	28	39.2857	60.0143
snp215	28	32.1429	57.3429	27	37.037	58.1852	27	44.4444	60.9556
snp216	26	38.4615	57.6538	26	38.4615	57.6538	26	46.1538	60.5308
snp217	30	26.6667	57.0733	30	26.6667	57.0733	28	39.2857	60.0143
snp218	25	44	58.576	25	40	57.08	38	21.0526	60.2158
snp219	26	38.4615	57.6538	26	38.4615	57.6538	26	46.1538	60.5308
snp220	27	37.037	58.1852	26	38.4615	57.6538	31	32.2581	59.9677
snp221	28	32.1429	57.3429	30	30	58.32	37	21.6216	59.8973
snp222	24	45.8333	58.0167	25	44	58.576	34	29.4118	61.0294
snp223	24	45.8333	58.0167	23	47.8261	57.4087	33	30.303	60.697
snp224	31	25.8065	57.5548	30	26.6667	57.0733	28	39.2857	60.0143
snp225	23	47.8261	57.4087	22	54.5455	58.4455	25	48	60.072
snp226	30	26.6667	57.0733	30	30	58.32	25	48	60.072
snp227	24	45.8333	58.0167	25	44	58.576	25	48	60.072
snp228	23	47.8261	57.4087	22	50	56.7455	27	44.4444	60.9556
snp229	25	44	58.576	23	47.8261	57.4087	34	26.4706	59.9294
snp230	22	50	56.7455	22	54.5455	58.4455	25	48	60.072
snp231	26	38.4615	57.6538	24	45.8333	58.0167	31	32.2581	59.9677
snp232	27	33.3333	56.8	26	38.4615	57.6538	27	44.4444	60.9556
snp233	33	21.2121	57.297	31	25.8065	57.5548	37	21.6216	59.8973
snp234	25	40	57.08	25	44	58.576	25	48	60.072
snp235	26	38.4615	57.6538	27	33.3333	56.8	34	26.4706	59.9294
snp236	27	37.037	58.1852	27	37.037	58.1852	32	31.25	60.3438
snp237	26	38.4615	57.6538	27	33.3333	56.8	30	36.6667	60.8133
snp238	26	38.4615	57.6538	25	40	57.08	31	32.2581	59.9677
snp239	30	30	58.32	29	31.0345	57.8483	34	26.4706	59.9294
snp240	26	38.4615	57.6538	25	44	58.576	34	26.4706	59.9294
snp241	29	31.0345	57.8483	29	31.0345	57.8483	31	32.2581	59.9677
snp242	25	44	58.576	26	38.4615	57.6538	25	48	60.072
snp243	24	45.8333	58.0167	23	47.8261	57.4087	31	32.2581	59.9677
snp244	22	50	56.7455	22	50	56.7455	25	48	60.072
snp245	27	33.3333	56.8	28	32.1429	57.3429	37	21.6216	59.8973
snp246	26	38.4615	57.6538	28	32.1429	57.3429	22	59.0909	60.1455
snp247	29	31.0345	57.8483	29	31.0345	57.8483	27	44.4444	60.9556
snp248	26	38.4615	57.6538	25	40	57.08	28	39.2857	60.0143
snp249	23	47.8261	57.4087	21	57.1429	57.8	33	30.303	60.697
snp250	23	47.8261	57.4087	22	50	56.7455	34	29.4118	61.0294
snp251	29	31.0345	57.8483	26	38.4615	57.6538	34	26.4706	59.9294
snp252	25	44	58.576	23	47.8261	57.4087	28	39.2857	60.0143
snp253	30	26.6667	57.0733	30	26.6667	57.0733	28	39.2857	60.0143
snp254	25	40	57.08	24	45.8333	58.0167	27	44.4444	60.9556
snp255	25	40	57.08	26	38.4615	57.6538	30	36.6667	60.8133
snp256	34	20.5882	57.7294	32	21.875	56.8375	25	48	60.072
snp257	22	54.5455	58.4455	21	57.1429	57.8	23	56.5217	60.6609
snp258	30	26.6667	57.0733	29	31.0345	57.8483	28	39.2857	60.0143
snp259	26	38.4615	57.6538	25	40	57.08	28	39.2857	60.0143
snp260	23	47.8261	57.4087	23	47.8261	57.4087	28	39.2857	60.0143
snp261	25	40	57.08	26	38.4615	57.6538	20	70	60.83
snp262	26	38.4615	57.6538	25	40	57.08	36	25	60.6
snp263	26	38.4615	57.6538	23	47.8261	57.4087	28	39.2857	60.0143
snp264	36	16.6667	57.4833	34	20.5882	57.7294	34	26.4706	59.9294
snp265	23	47.8261	57.4087	24	45.8333	58.0167	28	39.2857	60.0143
snp266	24	45.8333	58.0167	23	47.8261	57.4087	28	39.2857	60.0143
snp267	30	26.6667	57.0733	31	25.8065	57.5548	32	31.25	60.3438
snp268	24	45.8333	58.0167	23	47.8261	57.4087	28	39.2857	60.0143
snp269	25	40	57.08	26	38.4615	57.6538	31	32.2581	59.9677
snp270	31	25.8065	57.5548	30	26.6667	57.0733	35	25.7143	60.2743
snp271	31	25.8065	57.5548	31	25.8065	57.5548	28	39.2857	60.0143
snp272	29	31.0345	57.8483	29	31.0345	57.8483	27	44.4444	60.9556
snp273	26	38.4615	57.6538	27	37.037	58.1852	25	48	60.072
snp274	23	47.8261	57.4087	25	44	58.576	34	26.4706	59.9294
snp275	22	50	56.7455	23	47.8261	57.4087	36	25	60.6
snp276	26	38.4615	57.6538	24	45.8333	58.0167	27	44.4444	60.9556
snp277	29	31.0345	57.8483	28	32.1429	57.3429	30	36.6667	60.8133
snp278	26	38.4615	57.6538	28	32.1429	57.3429	25	48	60.072
snp279	24	45.8333	58.0167	23	47.8261	57.4087	31	32.2581	59.9677
snp280	29	31.0345	57.8483	27	33.3333	56.8	31	32.2581	59.9677
snp281	25	44	58.576	25	44	58.576	25	48	60.072
snp282	35	17.1429	57.0686	34	20.5882	57.7294	25	48	60.072
snp283	22	50	56.7455	22	54.5455	58.4455	37	21.6216	59.8973
snp284	28	32.1429	57.3429	26	38.4615	57.6538	34	26.4706	59.9294
snp285	31	25.8065	57.5548	29	31.0345	57.8483	34	26.4706	59.9294
snp286	24	45.8333	58.0167	26	38.4615	57.6538	37	21.6216	59.8973
snp287	36	16.6667	57.4833	37	13.5135	56.8649	35	25.7143	60.2743
snp288	23	47.8261	57.4087	22	54.5455	58.4455	25	48	60.072
snp289	36	16.6667	57.4833	34	20.5882	57.7294	34	29.4118	61.0294
snp290	26	38.4615	57.6538	27	37.037	58.1852	28	39.2857	60.0143
snp291	26	38.4615	57.6538	23	47.8261	57.4087	34	26.4706	59.9294
snp292	29	31.0345	57.8483	30	30	58.32	29	37.931	60.4276
snp293	34	20.5882	57.7294	32	25	58.0063	25	48	60.072
snp294	24	45.8333	58.0167	25	40	57.08	28	39.2857	60.0143
snp295	26	38.4615	57.6538	29	31.0345	57.8483	31	32.2581	59.9677
snp296	34	20.5882	57.7294	35	17.1429	57.0686	31	32.2581	59.9677
snp297	27	37.037	58.1852	26	38.4615	57.6538	22	59.0909	60.1455
snp298	29	31.0345	57.8483	29	31.0345	57.8483	31	32.2581	59.9677
snp299	25	44	58.576	26	38.4615	57.6538	30	36.6667	60.8133
snp300	26	38.4615	57.6538	27	37.037	58.1852	31	32.2581	59.9677
snp301	26	38.4615	57.6538	25	40	57.08	27	44.4444	60.9556
snp302	26	38.4615	57.6538	23	47.8261	57.4087	25	48	60.072
snp303	31	25.8065	57.5548	34	20.5882	57.7294	32	31.25	60.3438
snp304	26	38.4615	57.6538	25	44	58.576	34	29.4118	61.0294
snp305	26	38.4615	57.6538	26	38.4615	57.6538	28	39.2857	60.0143
snp306	21	57.1429	57.8	20	60	57.09	28	39.2857	60.0143
snp307	22	50	56.7455	23	47.8261	57.4087	31	32.2581	59.9677
snp308	27	33.3333	56.8	26	38.4615	57.6538	31	32.2581	59.9677
snp309	28	32.1429	57.3429	28	32.1429	57.3429	28	39.2857	60.0143
snp310	34	20.5882	57.7294	32	25	58.0063	29	37.931	60.4276
snp311	33	21.2121	57.297	33	21.2121	57.297	34	29.4118	61.0294
snp312	22	54.5455	58.4455	21	57.1429	57.8	31	32.2581	59.9677
snp313	26	38.4615	57.6538	25	40	57.08	34	26.4706	59.9294
snp314	25	44	58.576	25	40	57.08	37	21.6216	59.8973
snp315	30	30	58.32	29	31.0345	57.8483	32	31.25	60.3438
snp316	23	47.8261	57.4087	24	45.8333	58.0167	25	48	60.072
snp317	26	38.4615	57.6538	23	47.8261	57.4087	34	26.4706	59.9294
snp318	29	31.0345	57.8483	30	26.6667	57.0733	30	36.6667	60.8133
snp319	25	40	57.08	26	38.4615	57.6538	34	26.4706	59.9294
snp320	31	25.8065	57.5548	30	26.6667	57.0733	34	26.4706	59.9294
snp321	31	25.8065	57.5548	29	31.0345	57.8483	34	26.4706	59.9294
snp322	29	31.0345	57.8483	26	38.4615	57.6538	26	46.1538	60.5308
snp323	24	45.8333	58.0167	25	44	58.576	25	48	60.072
snp324	28	32.1429	57.3429	27	37.037	58.1852	37	21.6216	59.8973
snp325	29	31.0345	57.8483	29	31.0345	57.8483	30	36.6667	60.8133
snp326	29	31.0345	57.8483	26	38.4615	57.6538	30	36.6667	60.8133
snp327	29	31.0345	57.8483	26	38.4615	57.6538	29	37.931	60.4276
snp328	31	25.8065	57.5548	29	31.0345	57.8483	38	21.0526	60.2158
snp329	23	47.8261	57.4087	23	47.8261	57.4087	36	25	60.6
snp330	29	31.0345	57.8483	30	30	58.32	28	39.2857	60.0143
snp331	27	33.3333	56.8	27	37.037	58.1852	38	21.0526	60.2158
snp332	26	38.4615	57.6538	29	31.0345	57.8483	28	39.2857	60.0143
snp333	34	20.5882	57.7294	34	17.6471	56.6294	31	32.2581	59.9677
snp334	22	54.5455	58.4455	23	47.8261	57.4087	31	32.2581	59.9677
snp335	26	38.4615	57.6538	23	47.8261	57.4087	27	44.4444	60.9556
snp336	24	45.8333	58.0167	24	45.8333	58.0167	28	39.2857	60.0143
snp337	27	33.3333	56.8	26	38.4615	57.6538	35	25.7143	60.2743
snp338	27	33.3333	56.8	26	38.4615	57.6538	28	39.2857	60.0143
snp339	23	47.8261	57.4087	25	40	57.08	25	48	60.072
snp340	27	33.3333	56.8	28	32.1429	57.3429	31	32.2581	59.9677
snp341	25	40	57.08	26	38.4615	57.6538	29	37.931	60.4276
snp342	31	25.8065	57.5548	30	30	58.32	29	37.931	60.4276
snp343	25	40	57.08	24	45.8333	58.0167	31	32.2581	59.9677
snp344	32	21.875	56.8375	32	21.875	56.8375	32	31.25	60.3438
snp345	26	38.4615	57.6538	29	31.0345	57.8483	33	30.303	60.697
snp346	23	47.8261	57.4087	24	45.8333	58.0167	37	24.3243	60.9081
snp347	26	38.4615	57.6538	27	37.037	58.1852	25	48	60.072
snp348	23	47.8261	57.4087	25	44	58.576	34	26.4706	59.9294
snp349	25	44	58.576	24	45.8333	58.0167	31	32.2581	59.9677
snp350	28	32.1429	57.3429	28	32.1429	57.3429	20	70	60.83
snp351	29	31.0345	57.8483	27	37.037	58.1852	31	32.2581	59.9677
snp352	29	31.0345	57.8483	29	31.0345	57.8483	34	29.4118	61.0294
snp353	22	54.5455	58.4455	23	47.8261	57.4087	27	44.4444	60.9556
snp354	23	47.8261	57.4087	24	45.8333	58.0167	31	32.2581	59.9677
snp355	22	54.5455	58.4455	23	47.8261	57.4087	25	48	60.072
snp356	22	50	56.7455	22	54.5455	58.4455	25	48	60.072
snp357	31	25.8065	57.5548	31	25.8065	57.5548	29	37.931	60.4276
snp358	22	50	56.7455	23	47.8261	57.4087	25	48	60.072
snp359	27	37.037	58.1852	28	32.1429	57.3429	25	48	60.072
snp360	24	45.8333	58.0167	23	47.8261	57.4087	25	48	60.072
snp361	23	47.8261	57.4087	21	57.1429	57.8	31	32.2581	59.9677
snp362	22	50	56.7455	21	57.1429	57.8	28	39.2857	60.0143
snp363	21	57.1429	57.8	21	57.1429	57.8	28	39.2857	60.0143
snp364	21	57.1429	57.8	22	54.5455	58.4455	23	56.5217	60.6609
snp365	20	60	57.09	20	65	58.96	23	56.5217	60.6609
snp366	22	54.5455	58.4455	21	57.1429	57.8	20	70	60.83
snp367	23	47.8261	57.4087	24	45.8333	58.0167	25	48	60.072
snp368	22	54.5455	58.4455	23	47.8261	57.4087	28	39.2857	60.0143
snp369	23	47.8261	57.4087	23	47.8261	57.4087	26	46.1538	60.5308
snp370	21	57.1429	57.8	23	47.8261	57.4087	29	37.931	60.4276
snp371	23	47.8261	57.4087	23	47.8261	57.4087	25	48	60.072
snp372	23	47.8261	57.4087	22	54.5455	58.4455	27	44.4444	60.9556
snp373	23	47.8261	57.4087	25	44	58.576	23	56.5217	60.6609
snp374	20	60	57.09	21	57.1429	57.8	31	32.2581	59.9677
snp375	22	50	56.7455	23	47.8261	57.4087	31	32.2581	59.9677
snp376	26	38.4615	57.6538	26	38.4615	57.6538	25	48	60.072
snp377	26	38.4615	57.6538	25	40	57.08	31	32.2581	59.9677
snp378	25	44	58.576	24	45.8333	58.0167	31	32.2581	59.9677
snp379	20	60	57.09	21	57.1429	57.8	26	46.1538	60.5308
snp380	25	44	58.576	26	38.4615	57.6538	30	36.6667	60.8133
snp381	34	20.5882	57.7294	35	17.1429	57.0686	34	26.4706	59.9294
snp382	25	40	57.08	26	38.4615	57.6538	31	32.2581	59.9677
snp383	27	37.037	58.1852	26	38.4615	57.6538	31	32.2581	59.9677
snp384	21	57.1429	57.8	23	47.8261	57.4087	31	32.2581	59.9677
snp385	25	40	57.08	26	38.4615	57.6538	33	30.303	60.697
snp386	26	38.4615	57.6538	25	44	58.576	38	21.0526	60.2158
snp387	22	50	56.7455	22	50	56.7455	28	39.2857	60.0143
snp388	25	40	57.08	25	40	57.08	31	32.2581	59.9677
snp389	29	31.0345	57.8483	27	37.037	58.1852	37	21.6216	59.8973
snp390	25	40	57.08	25	44	58.576	25	48	60.072
snp391	25	40	57.08	25	40	57.08	31	32.2581	59.9677
snp392	26	38.4615	57.6538	29	31.0345	57.8483	32	31.25	60.3438
snp393	22	50	56.7455	22	50	56.7455	26	46.1538	60.5308
snp394	23	47.8261	57.4087	23	47.8261	57.4087	25	48	60.072
snp395	28	32.1429	57.3429	26	38.4615	57.6538	27	44.4444	60.9556
snp396	27	37.037	58.1852	27	37.037	58.1852	35	25.7143	60.2743
snp397	26	38.4615	57.6538	25	40	57.08	22	59.0909	60.1455
snp398	23	47.8261	57.4087	22	54.5455	58.4455	28	39.2857	60.0143
snp399	21	57.1429	57.8	21	57.1429	57.8	37	21.6216	59.8973
snp400	26	38.4615	57.6538	24	41.6667	56.4583	32	31.25	60.3438
snp401	25	44	58.576	25	44	58.576	31	32.2581	59.9677
snp402	36	16.6667	57.4833	36	16.6667	57.4833	34	29.4118	61.0294
snp403	24	45.8333	58.0167	23	47.8261	57.4087	25	48	60.072
snp404	36	16.6667	57.4833	34	20.5882	57.7294	36	25	60.6
snp405	27	33.3333	56.8	28	32.1429	57.3429	33	30.303	60.697
snp406	26	38.4615	57.6538	25	40	57.08	32	31.25	60.3438
snp407	21	57.1429	57.8	23	47.8261	57.4087	25	48	60.072
snp408	27	37.037	58.1852	29	31.0345	57.8483	30	36.6667	60.8133
snp409	24	45.8333	58.0167	25	44	58.576	29	37.931	60.4276
snp410	25	44	58.576	25	40	57.08	28	39.2857	60.0143
snp411	28	32.1429	57.3429	26	38.4615	57.6538	28	39.2857	60.0143
snp412	22	50	56.7455	22	50	56.7455	31	32.2581	59.9677
snp413	27	37.037	58.1852	26	38.4615	57.6538	29	37.931	60.4276
snp414	29	31.0345	57.8483	30	26.6667	57.0733	37	24.3243	60.9081
snp415	26	38.4615	57.6538	26	38.4615	57.6538	34	26.4706	59.9294
snp416	22	50	56.7455	22	54.5455	58.4455	25	48	60.072
snp417	25	44	58.576	25	40	57.08	31	32.2581	59.9677
snp418	29	31.0345	57.8483	27	33.3333	56.8	28	39.2857	60.0143
snp419	26	38.4615	57.6538	23	47.8261	57.4087	28	39.2857	60.0143
snp420	27	33.3333	56.8	29	31.0345	57.8483	28	39.2857	60.0143
snp421	37	13.5135	56.8649	37	13.5135	56.8649	33	30.303	60.697
snp422	29	31.0345	57.8483	28	32.1429	57.3429	34	26.4706	59.9294
snp423	27	33.3333	56.8	28	32.1429	57.3429	37	21.6216	59.8973
snp424	25	40	57.08	24	45.8333	58.0167	25	48	60.072
snp425	23	47.8261	57.4087	24	45.8333	58.0167	22	59.0909	60.1455
snp426	27	33.3333	56.8	28	32.1429	57.3429	31	32.2581	59.9677
snp427	26	38.4615	57.6538	28	32.1429	57.3429	34	26.4706	59.9294
snp428	26	38.4615	57.6538	29	31.0345	57.8483	30	36.6667	60.8133
snp429	25	44	58.576	26	38.4615	57.6538	31	32.2581	59.9677
snp430	23	47.8261	57.4087	23	47.8261	57.4087	30	36.6667	60.8133
snp431	26	38.4615	57.6538	26	38.4615	57.6538	30	36.6667	60.8133
snp432	25	44	58.576	23	47.8261	57.4087	31	32.2581	59.9677
snp433	32	25	58.0063	31	25.8065	57.5548	30	36.6667	60.8133
snp434	25	40	57.08	26	38.4615	57.6538	29	37.931	60.4276
snp435	32	25	58.0063	34	20.5882	57.7294	34	26.4706	59.9294
snp436	24	45.8333	58.0167	25	44	58.576	28	39.2857	60.0143
snp437	22	50	56.7455	23	47.8261	57.4087	28	39.2857	60.0143
snp438	27	33.3333	56.8	26	38.4615	57.6538	26	46.1538	60.5308
snp439	24	45.8333	58.0167	23	47.8261	57.4087	29	37.931	60.4276
snp440	26	38.4615	57.6538	24	45.8333	58.0167	26	46.1538	60.5308
snp441	29	31.0345	57.8483	26	38.4615	57.6538	28	39.2857	60.0143
snp442	30	30	58.32	31	25.8065	57.5548	29	37.931	60.4276
snp443	23	47.8261	57.4087	23	47.8261	57.4087	27	44.4444	60.9556
snp444	25	44	58.576	26	38.4615	57.6538	34	26.4706	59.9294
snp445	29	31.0345	57.8483	26	38.4615	57.6538	31	32.2581	59.9677
snp446	30	30	58.32	29	31.0345	57.8483	31	32.2581	59.9677
snp447	27	33.3333	56.8	26	38.4615	57.6538	29	37.931	60.4276
snp448	24	45.8333	58.0167	25	44	58.576	32	31.25	60.3438
snp449	29	31.0345	57.8483	26	38.4615	57.6538	34	26.4706	59.9294
snp450	23	47.8261	57.4087	21	57.1429	57.8	29	37.931	60.4276
snp451	22	50	56.7455	23	47.8261	57.4087	23	56.5217	60.6609
snp452	29	31.0345	57.8483	30	26.6667	57.0733	34	26.4706	59.9294
snp453	23	47.8261	57.4087	22	54.5455	58.4455	30	36.6667	60.8133
snp454	24	45.8333	58.0167	24	45.8333	58.0167	27	44.4444	60.9556
snp455	24	41.6667	56.4583	23	43.4783	55.7826	23	56.5217	60.6609
snp456	26	38.4615	57.6538	25	40	57.08	31	32.2581	59.9677
snp457	26	38.4615	57.6538	27	33.3333	56.8	20	70	60.83
snp458	31	25.8065	57.5548	31	25.8065	57.5548	28	39.2857	60.0143
snp459	24	45.8333	58.0167	23	47.8261	57.4087	34	26.4706	59.9294
snp460	28	32.1429	57.3429	27	37.037	58.1852	30	36.6667	60.8133
snp461	27	37.037	58.1852	27	37.037	58.1852	27	44.4444	60.9556
snp462	25	44	58.576	26	38.4615	57.6538	31	32.2581	59.9677
snp463	25	40	57.08	26	38.4615	57.6538	23	56.5217	60.6609
snp464	28	32.1429	57.3429	28	32.1429	57.3429	31	32.2581	59.9677
snp465	23	47.8261	57.4087	23	47.8261	57.4087	31	32.2581	59.9677
snp466	26	38.4615	57.6538	27	37.037	58.1852	31	32.2581	59.9677
snp467	23	47.8261	57.4087	25	44	58.576	27	44.4444	60.9556
snp468	29	31.0345	57.8483	26	38.4615	57.6538	28	39.2857	60.0143
snp469	29	31.0345	57.8483	31	25.8065	57.5548	32	31.25	60.3438
snp470	30	26.6667	57.0733	28	32.1429	57.3429	26	46.1538	60.5308
snp471	25	40	57.08	26	38.4615	57.6538	28	39.2857	60.0143
snp472	27	33.3333	56.8	27	33.3333	56.8	25	48	60.072
snp473	24	45.8333	58.0167	26	38.4615	57.6538	25	48	60.072
snp474	29	31.0345	57.8483	29	31.0345	57.8483	28	39.2857	60.0143
snp475	31	25.8065	57.5548	29	31.0345	57.8483	28	39.2857	60.0143
snp476	27	33.3333	56.8	28	32.1429	57.3429	37	21.6216	59.8973
snp477	25	40	57.08	24	45.8333	58.0167	31	32.2581	59.9677
snp478	29	31.0345	57.8483	29	31.0345	57.8483	34	29.4118	61.0294
snp479	26	38.4615	57.6538	27	37.037	58.1852	33	30.303	60.697
snp480	26	38.4615	57.6538	26	38.4615	57.6538	28	39.2857	60.0143
snp481	23	47.8261	57.4087	24	41.6667	56.4583	35	25.7143	60.2743
snp482	25	44	58.576	25	44	58.576	33	30.303	60.697
snp483	31	25.8065	57.5548	29	31.0345	57.8483	32	31.25	60.3438
snp484	26	38.4615	57.6538	26	38.4615	57.6538	31	32.2581	59.9677
snp485	26	38.4615	57.6538	23	47.8261	57.4087	26	46.1538	60.5308
snp486	26	38.4615	57.6538	25	40	57.08	33	30.303	60.697
snp487	23	47.8261	57.4087	22	50	56.7455	28	39.2857	60.0143
snp488	25	40	57.08	26	38.4615	57.6538	28	39.2857	60.0143
snp489	24	45.8333	58.0167	26	38.4615	57.6538	32	31.25	60.3438
snp490	24	45.8333	58.0167	23	47.8261	57.4087	31	32.2581	59.9677
snp491	26	38.4615	57.6538	25	44	58.576	34	29.4118	61.0294
snp492	32	21.875	56.8375	31	25.8065	57.5548	27	44.4444	60.9556
snp493	30	30	58.32	30	26.6667	57.0733	34	26.4706	59.9294
snp494	26	38.4615	57.6538	25	40	57.08	34	26.4706	59.9294
snp495	29	31.0345	57.8483	27	37.037	58.1852	31	32.2581	59.9677
snp496	26	38.4615	57.6538	24	45.8333	58.0167	35	25.7143	60.2743
snp497	25	40	57.08	24	45.8333	58.0167	31	32.2581	59.9677
snp498	21	57.1429	57.8	21	57.1429	57.8	37	21.6216	59.8973
snp499	23	47.8261	57.4087	24	45.8333	58.0167	34	26.4706	59.9294
snp500	31	25.8065	57.5548	29	31.0345	57.8483	25	48	60.072
